# Supplementary material for: Comparative Transcriptome Analysis to Reveal Genes Involved in Wheat Hybrid Necrosis
Source: MDPI journal article supplement (doi:10.3390/ijms151223332), 2014-12-16
Supplement: s1 [file s1]

## Supplementary Information

**Table S3.** Real-time PCR primers used in this study.

| Gene ID     | Annotation                                              | Primer Name                      | Sequences                                         |
|-------------|---------------------------------------------------------|----------------------------------|---------------------------------------------------|
| CUFF.11405  | vernalization insensitive 3                             | Tae-ver3-F<br>Tae-ver3-R         | AGCTGGAAACTGAGGTTGGTC<br>GTTTGACTGCAGCCAGTCATC    |
| CUFF.103621 | TIFY 10A-like                                           | Tae-TIFY10A-F<br>Tae-TIFY10A-R   | GTGTCTGCAGCAGTTGTGGTC<br>GGGAAGGTGCTCGTGTTCAAC    |
| CUFF.27326  | senescence-associated-like protein                      | Tae-sen-F<br>Tae-sen-R           | GGATAGCTCTGCCAGTGTATG<br>CCCTTGGAACATTCTTTGCAG    |
| CUFF.33698  | Minor histocompatibility antigen H13-like               | Tae-hisH13-F<br>Tae-hisH13-R     | CATATCGTCACTGAGCCCTTC<br>GCAACACTGACCATAACTGGAG   |
| CUFF.48158  | BONZAI 3-like                                           | Tae-BONZAI 3-F<br>Tae-BONZAI 3-R | TCAAGCTGAGCGATAGTTGTC<br>GAGGCCTATAACACTGACATC    |
| CUFF.67840  | Autoimmune regulator, histone H3 acetyltransferase IDM1 | Tae-IDM1-F<br>Tae-IDM1-R         | GAAAGAAACCTGTCACAAAGAG<br>CTGCACCTGTATGGGTTTCAGG  |
| CUFF.92582  | Histone acetyltransferase HAC5                          | Tae-HAC5-F<br>Tae-HAC5-R         | GACGGGAGGAGTAGACGAGGT<br>CCTCCTTCTTCATGTCTCCTC    |
| CUFF.16937  | Programmed cell death protein 4                         | Tae-PCD4-F<br>Tae-PCD4-R         | GAAGGGATTTCATAATGCTCCTG<br>CTGATGTCATCCAAATTCAGTG |
| CUFF.8126   | Absciscic stress-ripening protein 2                     | Tae-ASR2-F<br>Tae-ASR2-R         | GCATGCCTGCAGCATGATATG<br>CAGGAGTACAGGATGCCTGTC    |
| CUFF.60276  | auxin transport protein BIG-like                        | Tae-BIG-F<br>Tae-BIG-R           | CCAAGAGCTGACAGGCAATAAC<br>CCGAGGTAGTCTCGCGAAGAC   |
| CUFF.14592  | Defensin-like protein                                   | Tae-Defensin-F<br>Tae-Defensin-R | GATATACATACGACATACGTAC<br>GCCGTACGTCAGCTAGCTAGC   |
| CUFF.78043  | Ubiquitin carboxyl-terminal hydrolase 25                | Tae-Ubi25-F<br>Tae-Ubi25-R       | TCAAAGTTCATGAGATCATCCTT<br>GCAAAGTCCTGGGGAATTACG  |
| CUFF.30104  | E3 ubiquitin ligase BIG BROTHER-related protein         | Tae-UbiL-F<br>Tae-UbiL-R         | GCGGTATTATGAATCAATAAAATG<br>GAAGAACCTGTGTCCGATCTG |
| ACTIN       | Actin gene                                              | Tae- actin F1<br>Tae-actin R1    | AGGTTTCAGGTGCCCTGAGGT<br>CAACATCACACTTCATGATGGA   |
